# Supplementary material
Source: Springer Nature journal article supplement (https://www.springermedizin.de/resource/supplementary/12885_2014_4959_MOESM4_ESM.pdf/9467818)
Supplement: MOESM4 [file 9467818]

**Table S4.** Primer sequences and optimal PCR conditions for MassARRAY.

| Gene symbol | ID of CpG units | Size of amplicon (bp) | Primer sequences                                     |                                                                                          | Target Sequence<br>(Examined CpG units are marked in yellow. Examined CpG sites in each CpG unit are underlined. CpG sites which were present, but could not be evaluated by MassARRAY, are indicated by dotted underlining.)                                                                                                                                                                                                                                                                                                                                                                                       | Optimized PCR condition    |                                                                             |
|-------------|-----------------|-----------------------|------------------------------------------------------|------------------------------------------------------------------------------------------|---------------------------------------------------------------------------------------------------------------------------------------------------------------------------------------------------------------------------------------------------------------------------------------------------------------------------------------------------------------------------------------------------------------------------------------------------------------------------------------------------------------------------------------------------------------------------------------------------------------------|----------------------------|-----------------------------------------------------------------------------|
|             |                 |                       | Forward primer                                       | Reverse primer                                                                           |                                                                                                                                                                                                                                                                                                                                                                                                                                                                                                                                                                                                                     | Annealing temperature (°C) | Polymerase                                                                  |
| FAM150A     | 1-17            | 455                   | aggaagag<br>agGGGA<br>GGATTTA<br>GTAGGG<br>TAATTGT   | cagtaatac<br>gactcactat<br>aggagaa<br>ggctTTTC<br>ACCTAAA<br>AAAACAC<br>TAAAACC          | GGGAGGACCCAGTAGGGTAACCTGCCGCTCGCCCCGGCGGTTCTCCCTGGGC<br>TCTGTCTCCCGCCGCTCCACCCCGAGCCTCGGGGTCCGTACCGGCTTCC<br>CCTGGCTGGCGGGGTCAGTAGAACC <u>CGCGGC</u> CCTAGGTCCGGACGGAAAA<br>AGCAGGGC <u>CGGGGTGCG</u> GCCTGGATGAGCGGAGATCTC <u>CGCG</u> CCTTGGGCTC<br>AAAGGTGCGGGGTGCGCTCTGCTGCCGAGCCCTGCT <u>CGCT</u> CAGGAACACTG<br>GCCA <u>CGCCG</u> TCA <u>CG</u> CCAGC <u>CG</u> CCCCCTGCCCCAGGTCTGGAGGCC <u>CG</u> ACCTGC<br>TCTCCTAGG <u>CG</u> CAGCACCGCGTCTCTTCCGCGTGGGGAG <u>CGGCGGGCG</u> GA<br>AGAGGTCTGGGGCTGGGCAC <u>CG</u> GGGACA <u>CGCG</u> CCCAGCTCCCCTGGCCTCCC<br>TGGGGGAGTGGC <u>CG</u> GTTTCAGTGCCTCCCAGGTGAAA | 60                         | TaKaRa Taq<br>HS DNA<br>polymerase<br>(Takara Bio,<br>Shiga,<br>Japan)      |
| GRM6        | 18,19           | 188                   | aggaagag<br>agGGTTT<br>AGGATAA<br>GTTTGTG<br>ATAGATG | cagtaatac<br>gactcactat<br>aggagaa<br>ggctAAAA<br>CAAAAAA<br>ACAAACC<br>CAAAAAT          | GGTTCAGGACAAGTCTGTGACAGATG <u>CGGCCC</u> AGGCCCTGAGCGAGAGAGGA<br>TTTAAGGATTCTAGGGAGGGATGAGAGAC <u>CGTCTCCG</u> AGGGTGGAGACCCCTCC<br>TGAGTGTGGGGGTGGCGGTGCTGGCTCTCCCGCATCTCCTCCCCTCCCTC<br>TCCAATCTCTGGGTCTGTTTTCTGTTTT                                                                                                                                                                                                                                                                                                                                                                                              | 56                         | HotStar Taq<br>DNA<br>polymerase<br>(QIAGEN<br>GmbH,<br>Hilden,<br>Germany) |
| ZFP42       | 20-25           | 196                   | aggaagag<br>agGAGTT<br>GATGGG<br>TGGTTGT<br>AGTTT    | cagtaatac<br>gactcactat<br>aggagaa<br>ggctCCCA<br>TTTAAAA<br>AAAATTC<br>CATAAAA<br>CAAAA | GAGCTGATGGGTGGCTGTAGCCTGATTAGAC <u>CGCGT</u> CAGTC <u>CG</u> GAGGGTGGG<br>TCTTGGGAGGGGG <u>CG</u> CAGGGCAGTCCA <u>CG</u> TTTCCACTGCAGTTTCTCCTTTGT<br>TTTA <u>CG</u> TTTTGGGAGGAGGTGGCATTGGAAATAGCAGAGTGCTT <u>CGCG</u> GTAACA<br>GGGGTGAGTCTTGTTCATGGAACCTTTTTTCAAATGGG                                                                                                                                                                                                                                                                                                                                             | 56                         | HotStar Taq<br>DNA<br>polymerase<br>(QIAGEN)                                |

|         |       |     |                                                              |                                                                                     |                                                                                                                                                                                                                                                                                                                                                                                                                                                                                                                                                                                                                                                                                                |    |                                                |
|---------|-------|-----|--------------------------------------------------------------|-------------------------------------------------------------------------------------|------------------------------------------------------------------------------------------------------------------------------------------------------------------------------------------------------------------------------------------------------------------------------------------------------------------------------------------------------------------------------------------------------------------------------------------------------------------------------------------------------------------------------------------------------------------------------------------------------------------------------------------------------------------------------------------------|----|------------------------------------------------|
| ZNF540  | 26-42 | 463 | aggaagag<br>agGGGTA<br>GGGTAG<br>AATTAGG<br>TTAAAGA<br>AA    | cagtaatac<br>gactcactat<br>aggagaa<br>ggctACTA<br>AAATCAA<br>TAACCCC<br>CAAAAAA     | GGGCAGGGCAGAACCAGGCTAAAGAAA <b>CG</b> TCCAG <b>CG</b> TAGCTTCAAGGATGCAC<br><b>CGCG</b> TGATCCCTAT <b>CG</b> GATCTCCC <b>CGA</b> <b>CGCG</b> TCAGGCCCTGCCTAGA <b>CG</b> GTGCT<br>GGGAG <b>CGCG</b> TCTCCTTGAAC <b>CGTTGTCCCG</b> CCTGGGATTG <b>CG</b> AGGTAGGTAC <b>CG</b><br><b>GC</b> CTGCCTGTGTGTAC <b>CGGGGCTGCTGTCTCCG</b> GGGAGGGGCTTCTGG <b>CG</b> GA<br>CAGGAGAACCAAGCAGCCTCAGGAGCTGCCTGGGTGTGTGTGTTTCTGTGC <b>CG</b> GA<br>GTGTTGCATATCTCTGTGTGTGTTTCTGTGCAAGTGTGTCATGTCTGTGTGTGT<br>GGGGGGGGTGGTGTCTGGTGAAAAGAATGTGTCT <b>CGTGCG</b> GTGGAG <b>CGCG</b> T<br>TTCTCTGTAGT <b>CGCG</b> GGCTCTCTTATG <b>CG</b> CCCTCTTGGTCCCAAGTGTGCT<br>TTCTTGTTTTT <b>CG</b> CTTTCTTGGGGGTCATTGATTTACG | 58 | TaKaRa Taq<br>HS DNA<br>polymerase<br>(Takara) |
| ZNF154  | 43-48 | 279 | aggaagag<br>agGGTGA<br>ATATATT<br>TTAGAGA<br>AGTTAAA<br>ATGG | cagtaatac<br>gactcactat<br>aggagaa<br>ggctTCCC<br>TCCACTA<br>CCCTAAA<br>ACTTAAA     | GGTGAACACACCTCAGAGAAGCTAAAATGGC <b>CG</b> CCACGAAGAGGCCCCCCCAA<br>AAGTCC <b>CG</b> TCCTTTCTTTTTGTGACTCTCAAGGAAAGT <b>CG</b> GTTTTCTGAGCTCTT<br>ACTGGCTTAGTAG <b>CGTGCG</b> TTCAACGCAGAGCATTCTAGGTAATGTAGTTTTTC<br>ATAGATCC <b>CG</b> AGGTGGGTGC <b>CG</b> GGGACCTTTGCACCAACCTCTTGAGTAAA<br>AGCCAGCTCCAGGG <b>CGCTGGGCG</b> ATGAGAAATGGCTTATCCAAGTCTAGGG<br>CAGTGGAGGGA                                                                                                                                                                                                                                                                                                                         | 54 | HotStar Taq<br>DNA<br>polymerase<br>(QIAGEN)   |
| RISM4   | 49-59 | 404 | aggaagag<br>agGGAGT<br>TTTAGTT<br>TATGAG<br>GGAAGG<br>A      | cagtaatac<br>gactcactat<br>aggagaa<br>ggctAAAC<br>CCCAAAA<br>TCTCAA<br>AATAC        | GGAGCCCCAGCCCATGAGGGAAGGAGAGGAGAGATAAATGGGG <b>CG</b> CTCAAG<br>GCCTGGGG <b>CGCG</b> GGCAGGGGTCTTGGGCAGGGATCCTTGATGTGGCCAA<br>GACAAAGATGGAGAGGTAAGGTCTG <b>CGCG</b> CCACCTCCAATGG <b>CGGGGGCG</b><br><b>GTCC</b> GAGCCCCAGGGGTGGGA <b>CG</b> GCCAAAGCCAGGGCTTGAAGAGTGGC<br>ACATTCAAGGAGACTCAGGGAGGTGGCAGGT <b>CG</b> GCTCCAGGGACGAGGCAAG<br>GGGCCTCCAATAG <b>CGCG</b> GGTGAGGAGGAGATGGGTCTGG <b>CG</b> ACCCAAG<br>GGCCACCTG <b>CG</b> GGAAAGGTGAATGCAGACAATCT <b>CG</b> GGGTCCCTGGGGGAG<br>AAGGCCAGAAGGTAG <b>CG</b> CATCCTGGAGACCCTGGGGTCC                                                                                                                                                    | 54 | HotStar Taq<br>DNA<br>polymerase<br>(QIAGEN)   |
| PCDHAC1 | 60-73 | 362 | aggaagag<br>agTGGTA<br>GTTTTTG<br>GGATATA<br>AGAGGG          | cagtaatac<br>gactcactat<br>aggagaa<br>ggctAAAC<br>TACCCAA<br>ATCTTAA<br>CCTCCA<br>C | TGGCAGCTCCTGGGATACAGAGGGTGCAGGACAGACTTCAACC <b>CG</b> CAGCAG<br>GATCCAG <b>CGCG</b> GAAAGCTCTGCAGCAGGATCCAG <b>CGCG</b> GAAAGCCCC <b>CG</b> CA<br>GCATTTCTTT <b>CGGGGG</b> CTCCTGTTTCTTAAGCCTAGAAGGTGTGGT <b>CG</b> CTCA<br><b>CG</b> TTACCGTCCCGCCTCTCGCCGCCTCCGCTCGGCAGCTCCA <b>CG</b> CTGAGTCC<br><b>CGCCCTCTCCCGCG</b> GAGAGGTG <b>CGCG</b> GGGTGAGAG <b>CGCG</b> GGACC <b>CGA</b> <b>CG</b><br><b>CGCG</b> GCTCCCAAAGGG <b>CG</b> GCAGGAAGAGCCCAGCTGGGCTCAGCCACAGTTA<br>TCAGCAATCTG <b>CG</b> GGCAGAGGATGTGGAGTTAAGATCTGGGCAGCCT                                                                                                                                                          | 56 | HotStar Taq<br>DNA<br>polymerase<br>(QIAGEN)   |

|         |         |     |                                                           |                                                                                       |                                                                                                                                                                                                                                                                                                                                                                                                                                                                                                                                                                           |    |                                              |
|---------|---------|-----|-----------------------------------------------------------|---------------------------------------------------------------------------------------|---------------------------------------------------------------------------------------------------------------------------------------------------------------------------------------------------------------------------------------------------------------------------------------------------------------------------------------------------------------------------------------------------------------------------------------------------------------------------------------------------------------------------------------------------------------------------|----|----------------------------------------------|
| PRAC    | 74-78   | 264 | aggaagag<br>agGGTGA<br>AAGTTTG<br>TTGTTTA<br>TTTTTT<br>T  | cagtaatac<br>gactcactat<br>agggagaa<br>ggctCAAA<br>CTAAATT<br>CTAATCC<br>CCACCTT      | GGTGAAAGCCTGCTGCTCACCCCTTCCCTTGTTCCTCCAAAACCTTCTGAAGGCTCC<br>CAAATTCCTGGGAGACCCTCTCCAGGGCCTCCTGATGCAGCTACCATACTGA<br>GCGATC_CGTCCGATAA_CGCCCTTGGCCACCGATCAGTTTACCTTATTAGAGAGA<br>AAAGCACTTTGGAGGTAGTAAGATGGGC_CCGTCCTTGATCTGAGAAATGGGC<br>_CACAAACAT_CCGCTGTTCTCTGCAAAGGTGGGGACCAGAATCCAGCTTG                                                                                                                                                                                                                                                                             | 58 | HotStar Taq<br>DNA<br>polymerase<br>(QIAGEN) |
| TRH     | 79-97   | 414 | aggaagag<br>agAATAG<br>ATTTTAA<br>GAGGTG<br>GTGTAG<br>AAA | cagtaatac<br>gactcactat<br>agggagaa<br>ggctAAAA<br>AACTCCC<br>TTTCCAA<br>TACTCC       | AACAGATCTCCAGAGGTGGTGCAGAAACGACCC_CGCGCCCGGGCC_CCCCATCCT<br>G_CCGGCCAGTGCTCCCGCGCCCGGCTCCGGTCCCCAC_CGTCCCCG_CCCCAGA<br>TTTC_CCGGAGGAGCAGGCGGGCGGGGTCCCGCGGGGCGGGTGCCTGACAGCG<br>CCCCTTCCCGCGGGCGCGACCCCTCC_CCGCTGACCTACT_CGAGC_CGCGCG<br>_CTGGCG_CAGATATAAG_CGGCG_GCCCATCTGAAGAGGGCT_CGCGCAGG_CGCCCC<br>GGTCTCAG_CCGCTGCAGACTCCTGACCTGC_CGACTG_CCGATCC_CGAGTCCC<br>_CGGATCC_CCGACCCATCCTGTGGAGCCCACTCCTGGCAGGTAAC_CGCCCCAA<br>CCCCTCTCCTT_CCGCAGA_CGGTGTCCG_GGAGCACTGGAAGGGAGCCCTCT                                                                                       | 54 | HotStar Taq<br>DNA<br>polymerase<br>(QIAGEN) |
| SLC13A5 | 98-114  | 500 | aggaagag<br>agGAAGG<br>ATTTGAA<br>TTTGAG<br>ATATAGT<br>TT | cagtaatac<br>gactcactat<br>agggagaa<br>ggctAAAA<br>AACCCAA<br>AAACCTA<br>CAAAAA       | GAAGGACTTGAACCTGGAGACATAGCTCAG_CGCGCAGGCCAT_CGCGCGGGAG<br>GGAGACTGG_CGGGGCAGACGAGTGAGGGCAGCTAGAGG_CGCGCGGGCTT<br>AAGAAGGGGCCACAGTCCC_CGGGGATTGGGGAGGGGG_CGCTGACAACCT_CG<br>_CCCCC_CACGGGGGGCCTCCCGCGGCCCTGGGGCGGGGCCACCCCT_CGGG<br>GTCTGTGGGA_CGCGCCTGCCCCCAATTCTGCCACC_CGGCGGGCGGTGGGAGGC<br>_GTCTTTGGACTCAA_CGCTTCGGGCCAGCCCTTAGGGGCAGCCTGGGCCCTA<br>GCATCT_CGCGCCTGTCCAAGCCTCTCCTG_CGCTGCGCAGGCAGAGGTG_CGTCC<br>_CGGGGCTGCCAAG_CGGGGCGTGTTTTGGTCACTGGTGTGCCCGCTTTGGCG<br>TAAGG_CGCCCCCTCCCGCGTCC_CATCTGCTCTTTCTGGGCTCTGAAGGGTCC<br>_GGATGAAACTCTCTGCAGGCCCTCTGGGTCTCTC | 54 | HotStar Taq<br>DNA<br>polymerase<br>(QIAGEN) |
| SLC13A5 | 115-130 | 463 | aggaagag<br>agTTTTTT<br>TGGGTTT<br>TGAAGG<br>GTT          | cagtaatac<br>gactcactat<br>agggagaa<br>ggctTTAT<br>ATCCCTT<br>CCTCTCT<br>AAAACCT<br>C | CTTTCCTGGGCTCTGAAGGGTCC_CCGATGAACTCTCTGCAGGCCTCTGGGTC<br>TCTCAGGTCTATCTCCC_CGATCTCCCTCTCCTTTCCATCTCCTTACTTCCGCCCC<br>TCCGGTGTCTCTCCGAGAGGTGTCCCCCA_CGCCCCCGGCCCTCCG_CACCGC<br>GGCCCTCGCTTCCCGGTCCCCCTGGCTTCTCCTCGCCA_CGTCCG_CCCCACTCTA<br>GGTGCAGGACCCCTTTTCCC_CGCTCGCACTCTC_CGGCCCGGAGCTCCTGGGC<br>_GAT_CG_CACAGGGAAGCGAGGCCACTGTCTCCTCTGTCCCAGGGGCTGT_CGC<br>_CTCCAGTGGAG_CGCTGCACCC_CG_CAGA_CGCCCCGGCG_GGCAGATG_CGGACAC<br>_CGCTTTGGAGGGGCCCCACCGAGCCTCAGCAGC_CG_CAGCTGCC_CGCCCCGAC<br>CCAGGTCAGAGGGAAACCGGAGCTCTAGAGAGGAAGGGACACAA                                    | 58 | HotStar Taq<br>DNA<br>polymerase<br>(QIAGEN) |

|         |         |     |                                                            |                                                                                     |                                                                                                                                                                                                                                                                                                                                                                                                                                                                                                                                                                                                                                                                                                    |    |                                              |
|---------|---------|-----|------------------------------------------------------------|-------------------------------------------------------------------------------------|----------------------------------------------------------------------------------------------------------------------------------------------------------------------------------------------------------------------------------------------------------------------------------------------------------------------------------------------------------------------------------------------------------------------------------------------------------------------------------------------------------------------------------------------------------------------------------------------------------------------------------------------------------------------------------------------------|----|----------------------------------------------|
| SLC13A5 | 123-135 | 384 | aggaagag<br>agTTTTTT<br>TTGTTTT<br>AGGGGT<br>TGT           | cagtaatac<br>gactcactat<br>aggagaa<br>ggctCCAC<br>CAACATA<br>AATAAAA<br>CTCCCC      | CCTCCTCTGTCCCAGGGGCTGT <b>CGCG</b> CTCCAGTGGA <b>CG</b> CTGCACCC <b>CG</b> CAGA<br><b>CGCCCGGCG</b> GGCAGATG <b>CG</b> GACAC <b>CGCG</b> TCTTGGAGGGGCCACCGAGCCT<br>CAGCAGC <b>CG</b> CAGCTGCC <b>CGCCCG</b> ACCCAGGTGAGAGGGAAACGGAGCTCTAG<br>AGAGGAAGGGACACAACCTAAGG <b>CG</b> ACACTGAGACAGT <b>CG</b> CCCATGTATTTCATT<br>CAGCC <b>CG</b> CCAGGCAACAGACAGGTGC <b>CG</b> AGCACCTCTTCTC <b>CGCG</b> AGGCCCT<br>GTTTTGGGCACTGGAGACACACGGATGCAAAGACATCCCCACCTCTGTGATTTT<br>CTTCTTTCCTCTCCTCTGCCTGCCTCTCATTCTGCAGTTCCTTTTGGGGAGTCT<br>CATCCATGCTGGTGG                                                                                                                                                   | 58 | HotStar Taq<br>DNA<br>polymerase<br>(QIAGEN) |
| ZNF671  | 136-156 | 428 | aggaagag<br>agTGGGA<br>TATAGG<br>GGTTGTA<br>GGTATTT        | cagtaatac<br>gactcactat<br>aggagaa<br>ggctATAA<br>AAACCAC<br>ACTCTAC<br>CCACAAA     | TGGGACACAGGGGCTGCAGGCACCTTACGATT <b>CG</b> GAGT <b>CG</b> GAGAAAGGGTGA<br>CTGAGGGCC <b>CG</b> GAGGACGCAGCACCCACC <b>CGCGCG</b> GAGTCC <b>CG</b> TTAGCTC <b>CG</b> C<br>CATAGGAC <b>CGTGGGCGCG</b> GACAGCTGC <b>CG</b> GGAG <b>CG</b> GCAGG <b>CGTCTCG</b> AT <b>CG</b><br>GGGACGCAGGCACCTTC <b>CGTCCCTGCAGAGCATCAGA</b> <b>CGCGTCTCG</b> GGACACT<br>GGGGACAACATCTCCTC <b>CGCG</b> CTTTCCCAACACCTCCACCTG <b>CG</b> GCCACACA<br>AG <b>CG</b> TTACAGAACCC <b>CG</b> GCCAGGGACAGCCTGACAGAAACAAAATGTC <b>CG</b> CTA<br>CAAGGAGGAGC <b>CG</b> GAAGTCC <b>CG</b> CCCA <sub>CG</sub> GCACCCCC <b>CG</b> CAGGCACTGAAACAC<br>CCCTCTCCTGGGCCCTCATTGGGTATGCAAC <sub>CG</sub> TATAGGTTTGTGGGTAGAGTGT<br>GGTCCAC | 58 | HotStar Taq<br>DNA<br>polymerase<br>(QIAGEN) |
| WNT3A   | 157-165 | 348 | aggaagag<br>agGTTTA<br>TTTGGTA<br>ATGAGG<br>GGTTGTT        | cagtaatac<br>gactcactat<br>aggagaa<br>ggctTTCC<br>TCAATCT<br>TAAACAT<br>CTCAAAA     | GTCCACCTGGCAATGAGGGGCTGCTGTAGAGAGAGTTAAGGGTGAGTTAAGCA<br><b>CG</b> GGGTGTGAGGGGCTCCAGGACCCTCAATCAGAAAG <b>CGCTGTGCTGCG</b> CCC<br>TCCACACCAGAAAAG <b>CGCGTTCCG</b> TGAGACCCTCCCCAGCCTGG <b>CG</b> ATGGAA<br>GTGCAGATAAACCAAAGGAAGGGTCC <b>CG</b> AAAGTCTCTCAGGCCTCCACC<br>TCCATGCACATATCCTGTGGGAGGGGGAA <b>CG</b> GTGGCCACACTTT <b>CG</b> CCAGGG<br>CTTGATCCCTCAGAGCCCTCACCAGCAAGGATCACCCAGTTC <b>CG</b> AATTA<br>GGG <b>CG</b> CTCTGAGATGCCAAGATTGAGGAA                                                                                                                                                                                                                                           | 58 | HotStar Taq<br>DNA<br>polymerase<br>(QIAGEN) |
| KHDRBS2 | 166-181 | 422 | aggaagag<br>agTTTGG<br>TATTATT<br>ATTAATG<br>AGTGGTT<br>GG | cagtaatac<br>gactcactat<br>aggagaa<br>ggctAACA<br>AATCCTA<br>CCTTCTA<br>CCAAAA<br>A | CCTGGCACCAACCAATGAGTGGTTGG <b>CG</b> GAGGTGGGCCGCGTCTGTTCC<br><b>CG</b> CCTCTCCAGTTAAGGC <b>CG</b> CTGGTGTGAGC <b>CGGGGCTCTGCGCG</b> AGCGAGG<br>GACGACGGAAGGGA <b>CG</b> GGCAGGTGTGGG <b>CGCG</b> GGGCCACGCAGCC <b>CG</b> A <b>CGG</b><br><b>CG</b> GGAGT <b>CG</b> CAGGTGCTGGGTGCATGGGCCAGTGAAGGACGCACAGAGATCCC<br>T <b>CGCCGCGCG</b> GAGGAGGAGCAG <b>CGCG</b> GGAGCCAGGCGCTGCCCAAGACCC<br>TGCCTG <b>CGTCCG</b> AGCGAGCGGAACCT <b>CGCGCTTCGCGCG</b> GGGACAATC <b>CG</b> AA<br>GTC <b>CGCG</b> CTATGGAAGAGGAGAAATATTTGCCTGAGCTGATGGCAGAGAAAGA<br>TAGCCTGGATCCATCTTTTGTGCATG <b>CGTCCCG</b> CCTTTTGGCAGAAGGTAGGAC<br>TTGCC                                                                          | 56 | HotStar Taq<br>DNA<br>polymerase<br>(QIAGEN) |
| ASCL2   | 182-193 | 339 | aggaagag<br>agGTTAA<br>TAAAGTT<br>GGGTTTT<br>TGTTGG        | cagtaatac<br>gactcactat<br>aggagaa<br>ggctAATA<br>CAAACCT<br>CCAAAC<br>CCTCC        | GCTAACAAAGCTGGGTTCTGCTGGGCCCGCCCTGCTCCTCGCCCCGCGA<br>CTGGGCTGGGCGCGCTGTCCCCTAG <b>CG</b> CAGCTATGTCC <b>CG</b> AG <b>CGCG</b> CCCCCA<br>CCTGTG <b>CG</b> TAAATCTACTGGGAATGGGGGTGGACTG <b>CG</b> CCTTACCTGGGG <b>CG</b> G<br>GGTGGGCTTAAGGAGTGGT <b>CG</b> GAGACTGAGG <b>CG</b> GGGTGGGAGGTTTCAGGTTT<br>C <b>CGGGGCG</b> CCTTCCCCAACCCGCCCCGCTTTCCCGTCCCTCCA <b>CGCG</b> CACC<br>CTGCCTGTGTTTTCCGTGC <sub>CG</sub> CCCCCGCCTGAGGGCTCTGGG <b>CG</b> GCACCTTA<br>ACC <b>CG</b> GAGGGCCTGGAGGTCTGCACC                                                                                                                                                                                                  | 58 | HotStar Taq<br>DNA<br>polymerase<br>(QIAGEN) |
